# Supplementary material for: Antioxidant and α-Glucosidase Inhibitory Activities Guided Isolation and Identification of Components from Mango Seed Kernel
Source: Hindawi journal article supplement (doi:10.1155/2020/8858578), 2020-12-28
Supplement: f1 [file 8858578.f1.pdf]

**Antioxidant and  $\alpha$ -glucosidase inhibitory activities guided isolation  
and identification of components from mango seed kernel**

Dan Yang<sup>a,1</sup>, Xuee Chen<sup>a,1</sup>, Xida Liu<sup>a</sup>, Na Han<sup>a</sup>, Zhihui Liu<sup>a</sup>, Sikai Li<sup>a</sup>, Jianxiu Zhai<sup>a</sup>,

Jun Yin<sup>a\*</sup>

*<sup>a</sup> Department of Pharmacognosy and Utilization Key Laboratory of Northeast Plant  
Materials, School of Traditional Chinese Medicine, Shenyang Pharmaceutical  
University, Shenyang 110016, China*

\*Corresponding author

*Address:* Shenyang Pharmaceutical University, 103 Wenhua Road, Shenhe district,  
China.

*E-mail address:* [362354426@qq.com](mailto:362354426@qq.com) (Dan Yang), [cxe1210@163.com](mailto:cxe1210@163.com) (Xuee Chen),

[441590920@qq.com](mailto:441590920@qq.com) (Xida Liu), [hanna82@163.com](mailto:hanna82@163.com) (Na Han),

[liuzhihuishenyang@163.com](mailto:liuzhihuishenyang@163.com) (Zhihui Liu), [lihaoshuo672406281@126.com](mailto:lihaoshuo672406281@126.com) (Sikai Li),

[lookingformilk@163.com](mailto:lookingformilk@163.com) (Jianxiu Zhai), [yinjun826@sina.com](mailto:yinjun826@sina.com) (Jun Yin)

<sup>1</sup> These authors are joint the first authors.

## List for supporting information

|                                                                                                                 |    |
|-----------------------------------------------------------------------------------------------------------------|----|
| Figure S1. GC–MS chromatogram of the petroleum ether fraction from mango kernel.....                            | 3  |
| Figure S2. GC-MS spectrum of component <b>S1</b> .....                                                          | 4  |
| Figure S3. GC-MS spectrum of component <b>S2</b> .....                                                          | 4  |
| Figure S4. GC-MS spectrum of component <b>S3</b> .....                                                          | 4  |
| Figure S5. GC-MS spectrum of component <b>S4</b> .....                                                          | 5  |
| Figure S6. GC-MS spectrum of component <b>S5</b> .....                                                          | 5  |
| Figure S7. GC-MS spectrum of component <b>S6</b> .....                                                          | 6  |
| Figure S8. GC-MS spectrum of component <b>S7</b> .....                                                          | 6  |
| Figure S9. GC-MS spectrum of component <b>S8</b> .....                                                          | 7  |
| Figure S10. GC-MS spectrum of component <b>S9</b> .....                                                         | 7  |
| Figure S11. GC-MS spectrum of component <b>S10</b> .....                                                        | 7  |
| Figure S12. GC-MS spectrum of component <b>S11</b> .....                                                        | 8  |
| Figure S13. GC-MS spectrum of component <b>S12</b> .....                                                        | 8  |
| Figure S14. GC-MS spectrum of component <b>S13</b> .....                                                        | 9  |
| Figure S15. GC-MS spectrum of component <b>S14</b> .....                                                        | 9  |
| Figure S16. GC-MS spectrum of component <b>S15</b> .....                                                        | 10 |
| Figure S17. GC-MS spectrum of component <b>S16</b> .....                                                        | 10 |
| Figure S18. GC-MS spectrum of component <b>S17</b> .....                                                        | 10 |
| Figure S19. GC-MS spectrum of component <b>S18</b> .....                                                        | 11 |
| Figure S20. GC-MS spectrum of component <b>S19</b> .....                                                        | 11 |
| Figure S21. GC-MS spectrum of component <b>S20</b> .....                                                        | 11 |
| Figure S22. GC-MS spectrum of component <b>S21</b> .....                                                        | 12 |
| Figure S23. GC-MS spectrum of component <b>S22</b> .....                                                        | 12 |
| Figure S24. GC-MS spectrum of component <b>S23</b> .....                                                        | 12 |
| Table S1 Molecular interactions of the $\alpha$ -glucosidase (3A4A) active site with compounds <b>1-2</b> ..... | 13 |

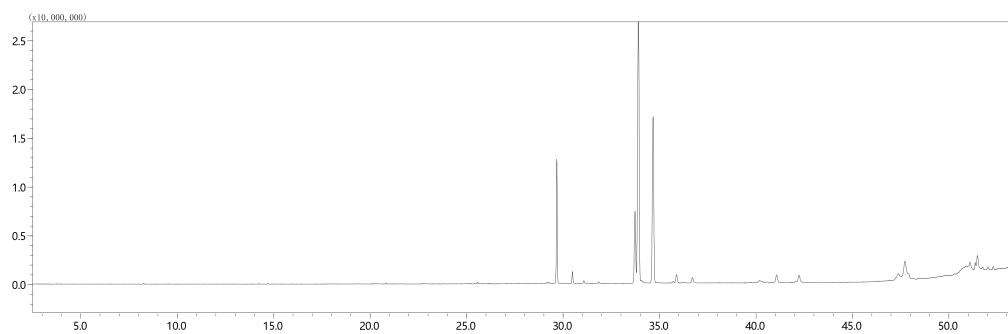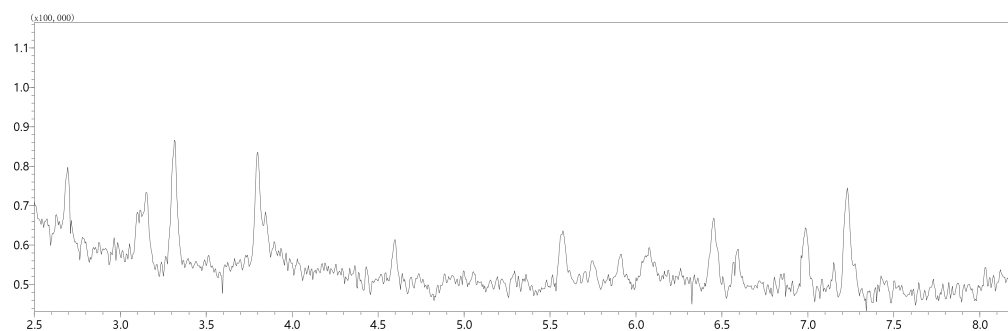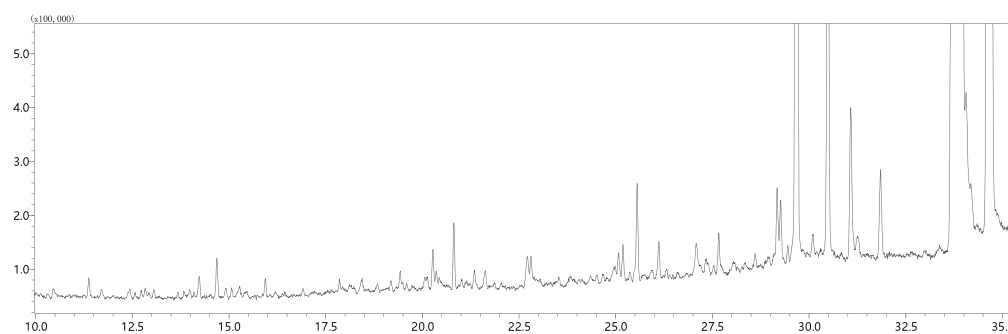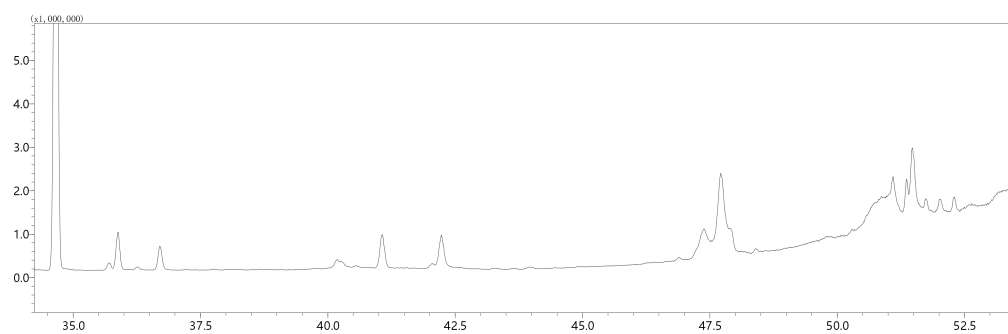

Figure S1. GC-MS chromatogram of the petroleum ether fraction from mango seed kernel

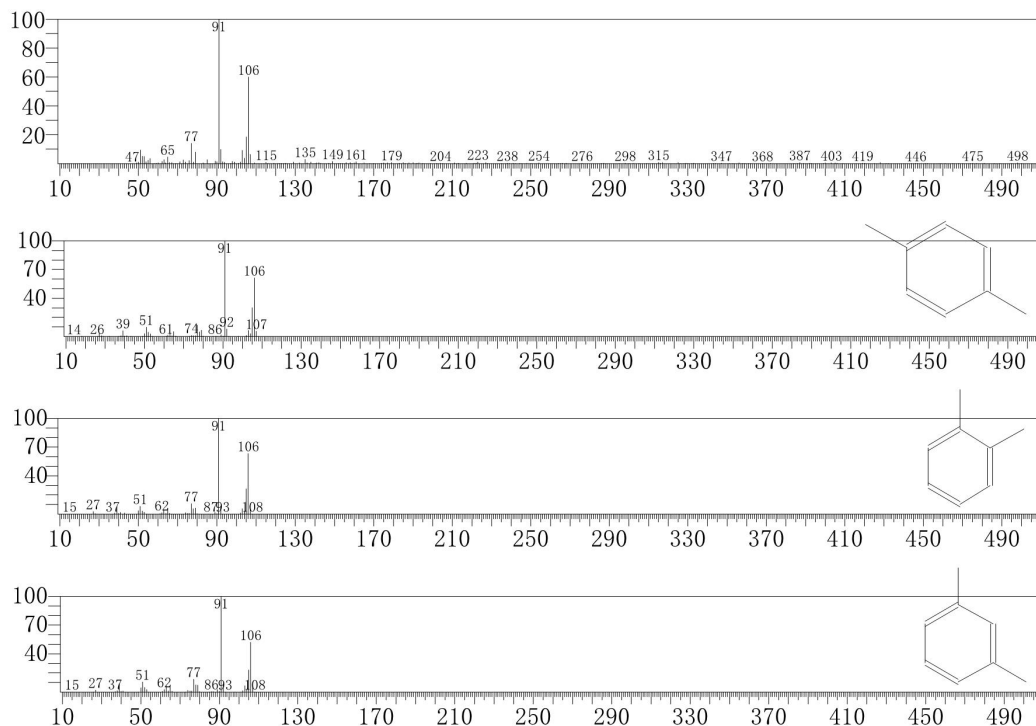

Figure S2. GC-MS spectrum of component 1

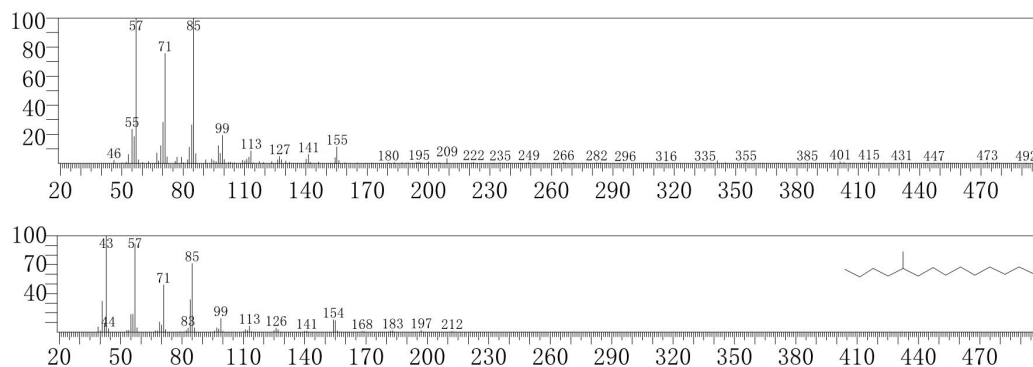

Figure S3. GC-MS spectrum of component 2

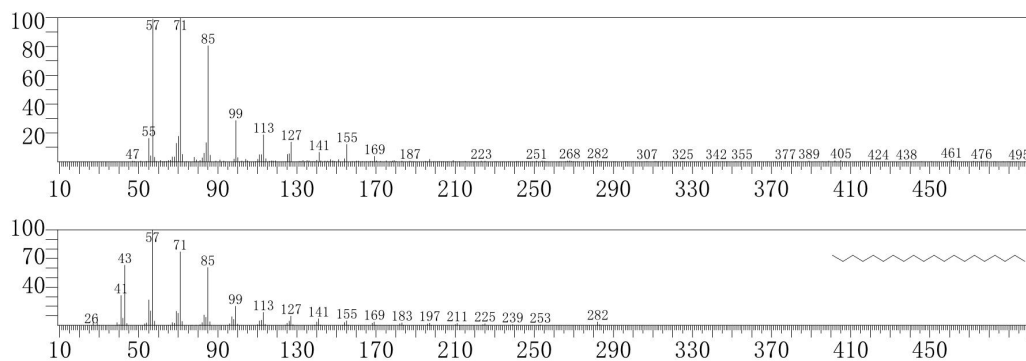

Figure S4. GC-MS spectrum of component 3

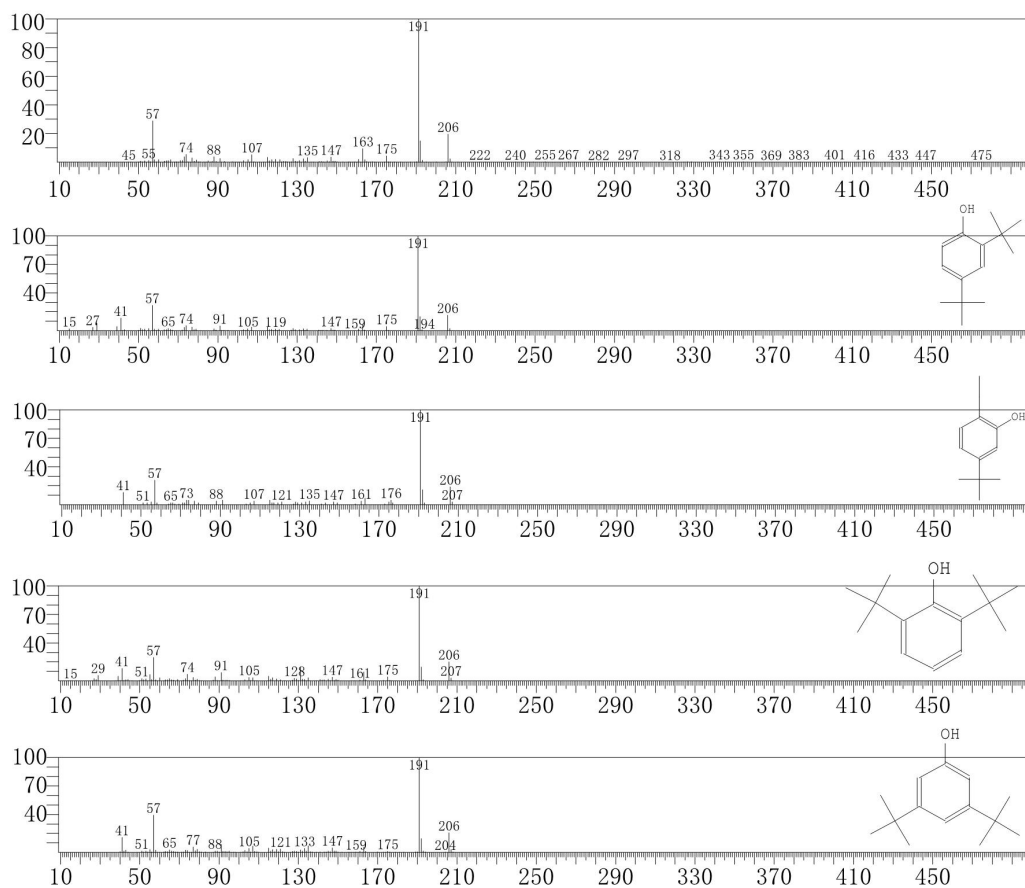

Figure S5. GC-MS spectrum of component 4

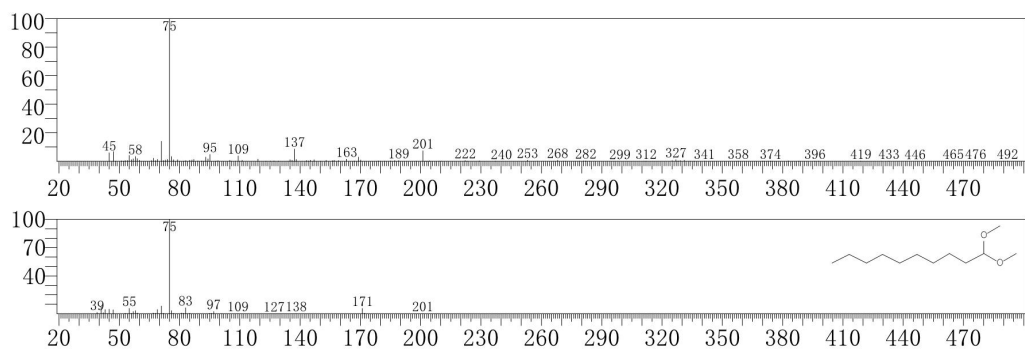

Figure S6. GC-MS spectrum of component 5

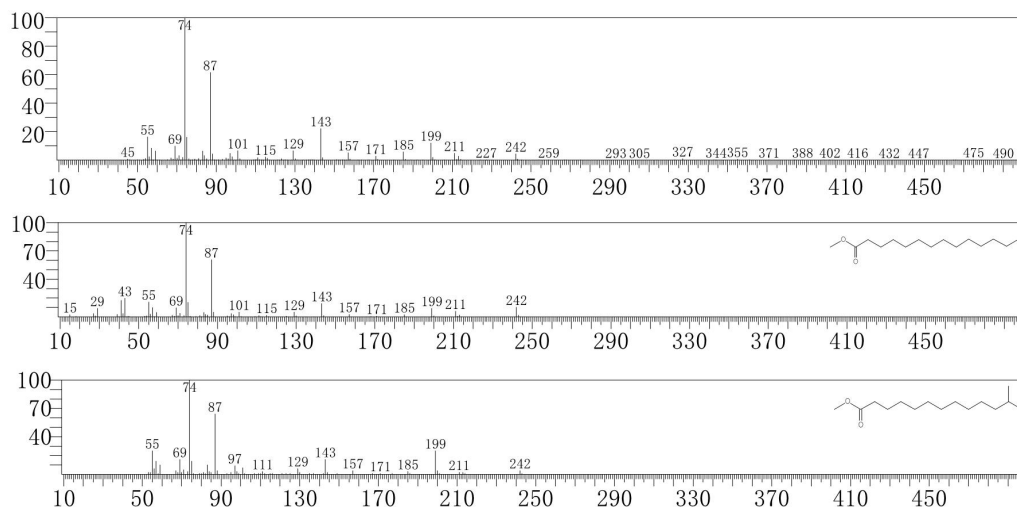

Figure S7. GC-MS spectrum of component 6

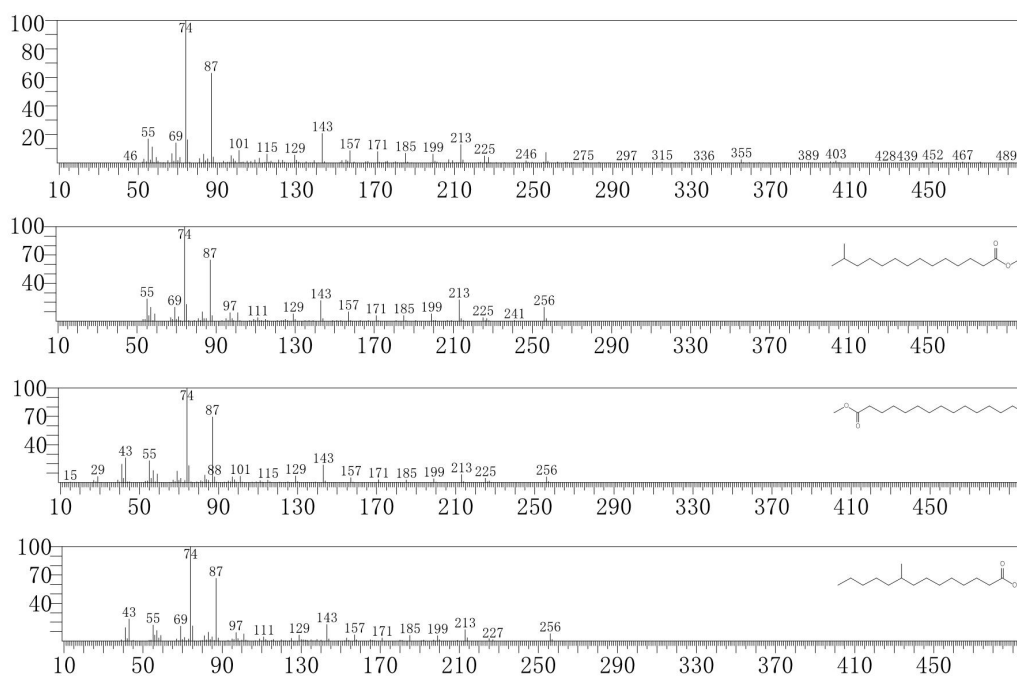

Figure S8. GC-MS spectrum of component 7

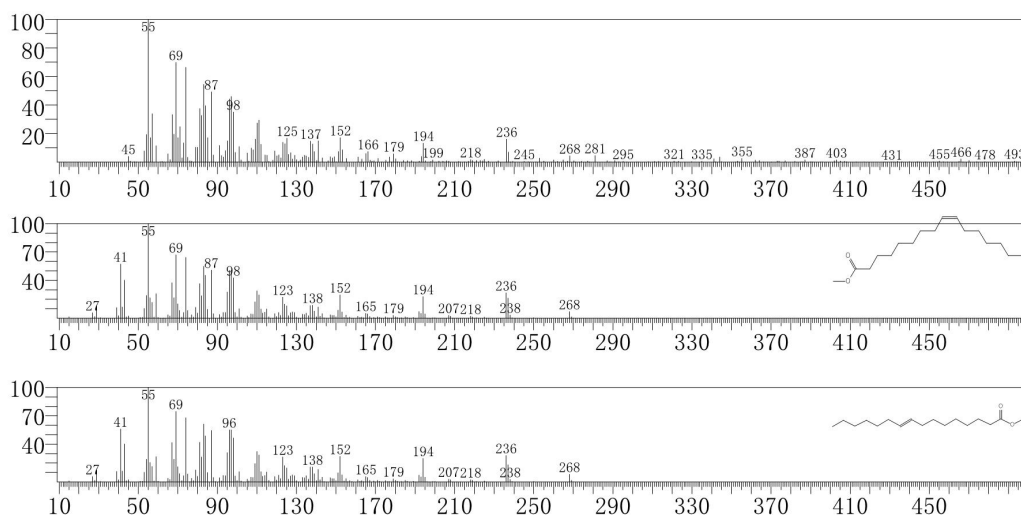

Figure S9. GC-MS spectrum of component **8**

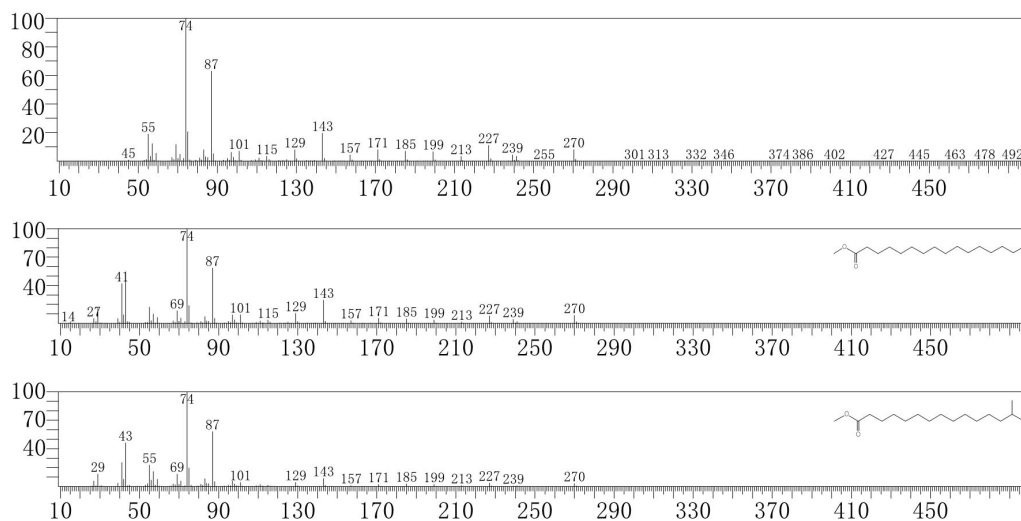

Figure S10. GC-MS spectrum of component **9**

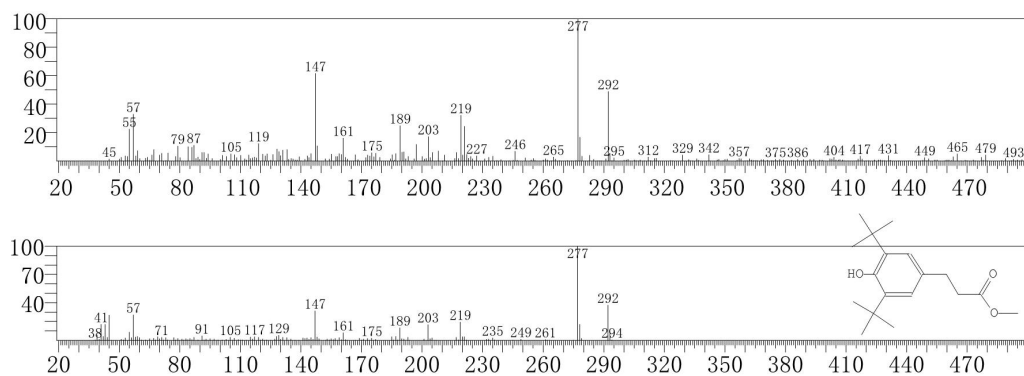

Figure S11. GC-MS spectrum of component **10**

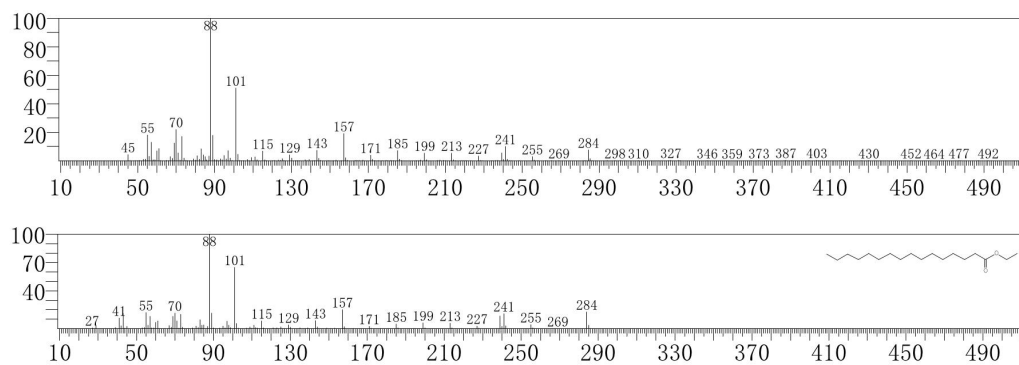

Figure S12. GC-MS spectrum of component 11

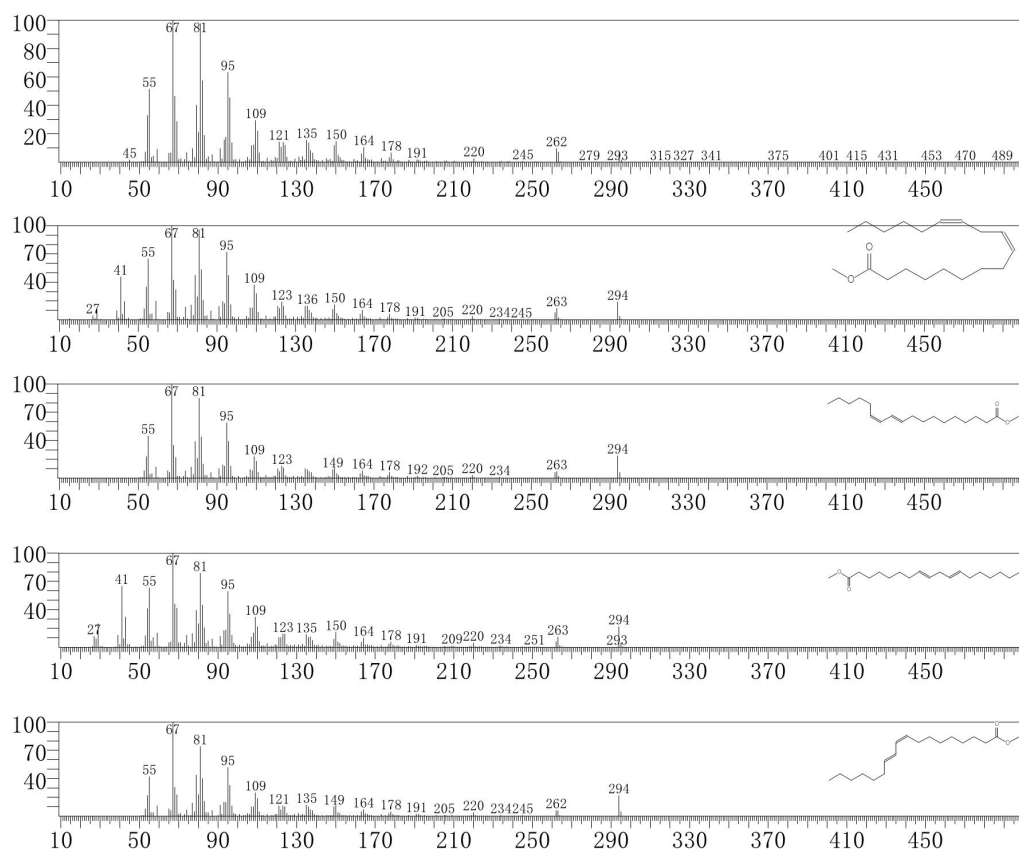

Figure S13. GC-MS spectrum of component 12



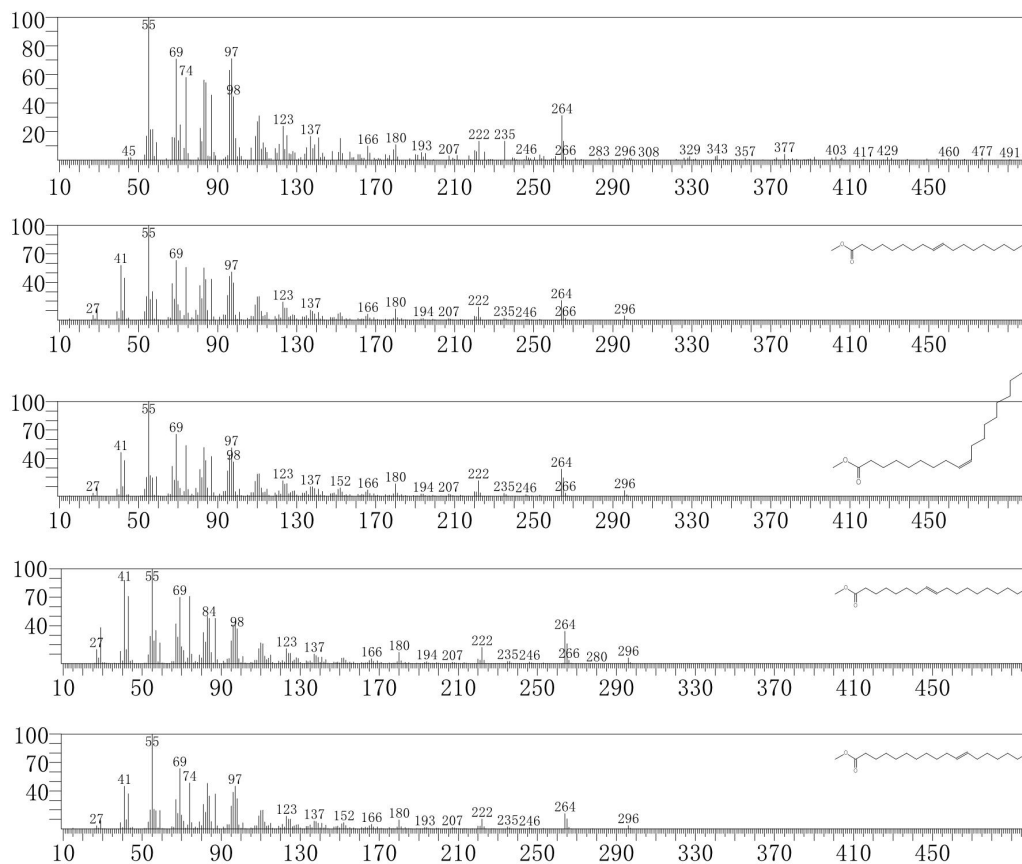

Figure S14. GC-MS spectrum of component 13

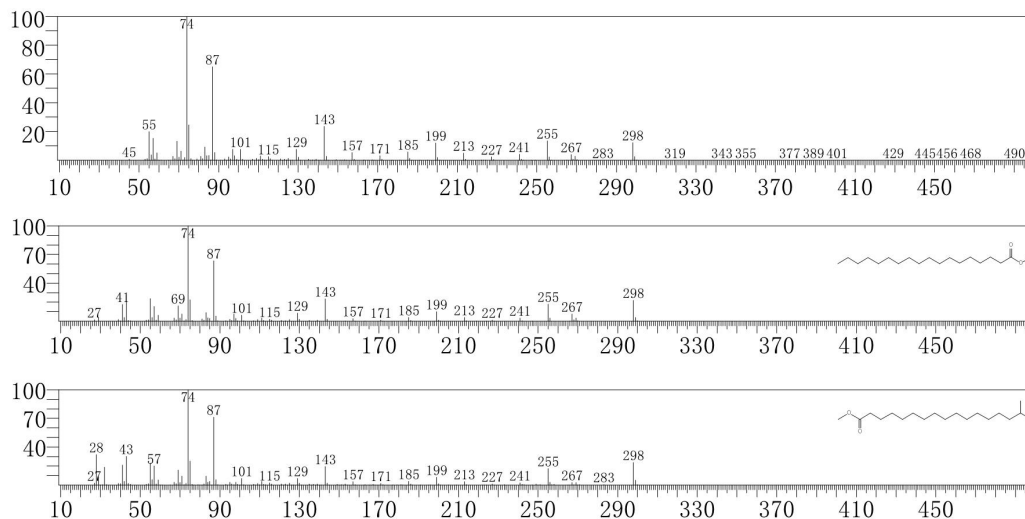

Figure S15. GC-MS spectrum of component 14

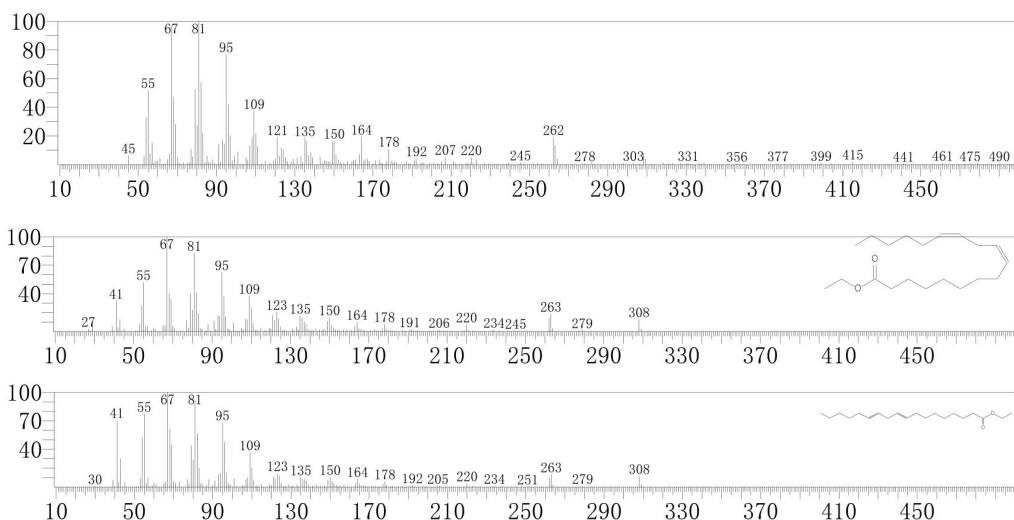

Figure S16. GC-MS spectrum of component 15

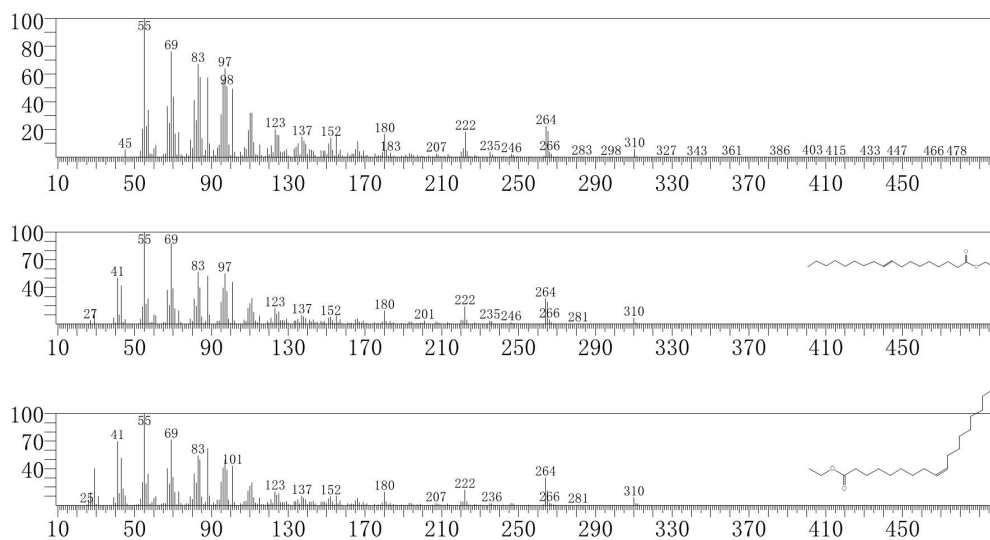

Figure S17. GC-MS spectrum of component 16

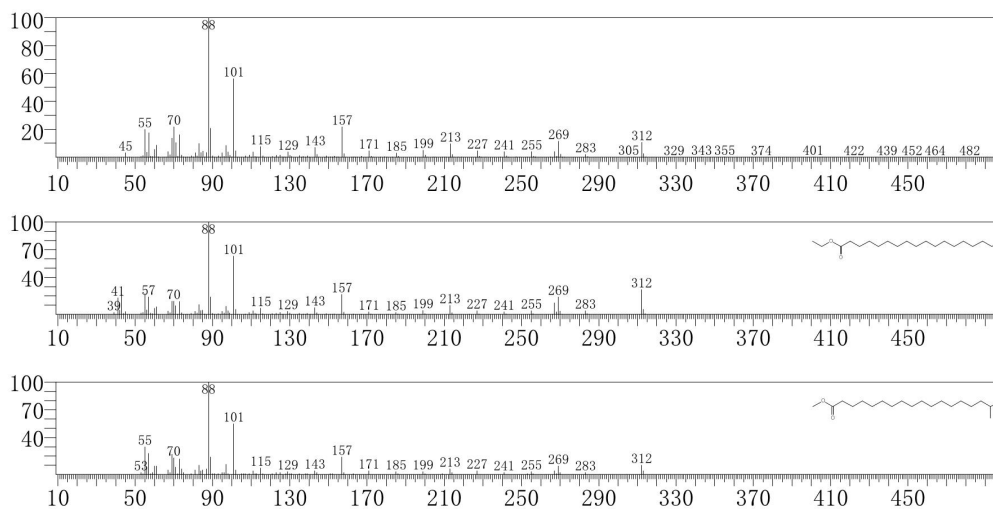

Figure S18. GC-MS spectrum of component 17

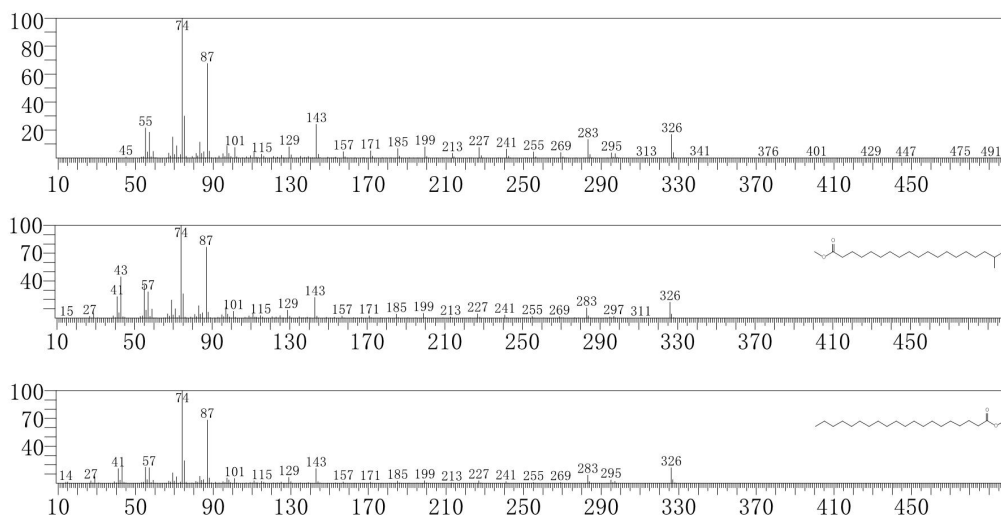

Figure S19. GC-MS spectrum of component 18

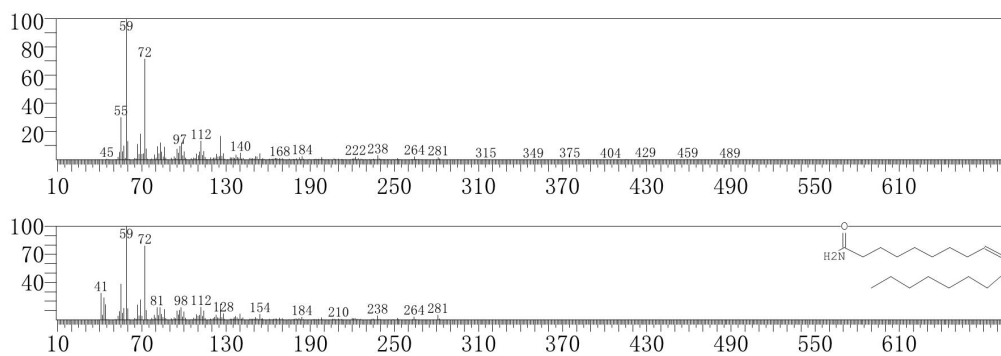

Figure S20. GC-MS spectrum of component 19

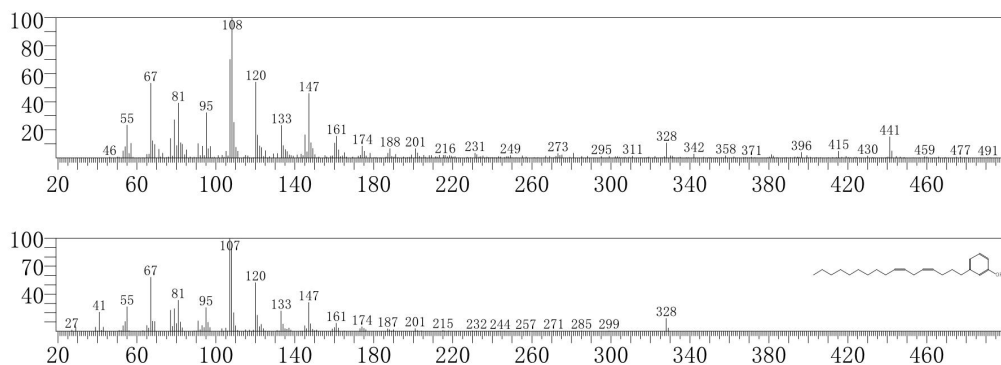

Figure S21. GC-MS spectrum of component 20

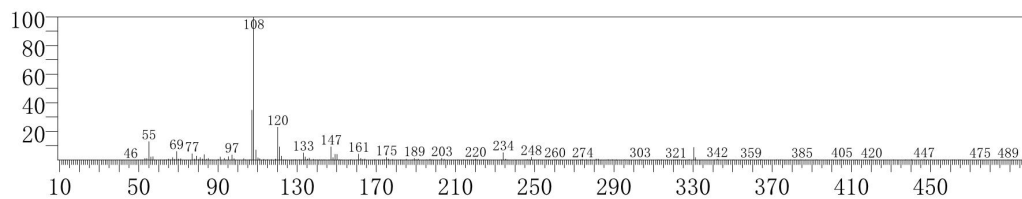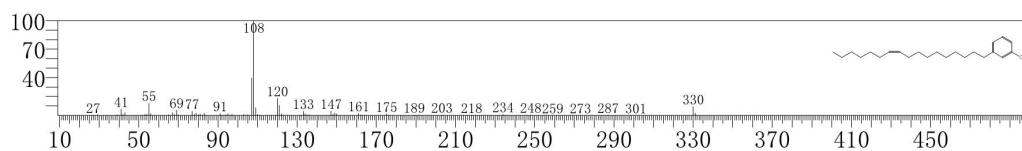

Figure S22. GC-MS spectrum of component **21**

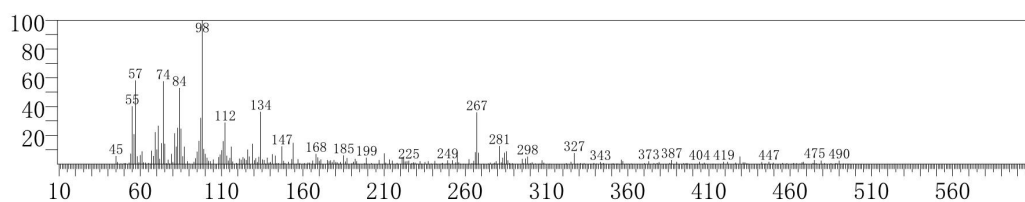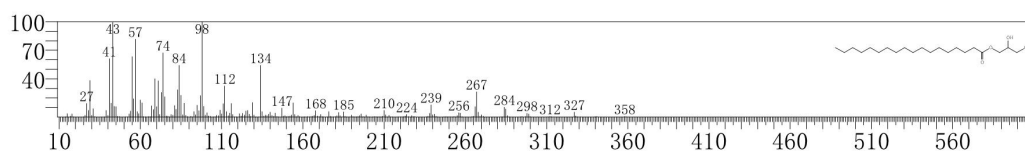

Figure S23. GC-MS spectrum of component **22**

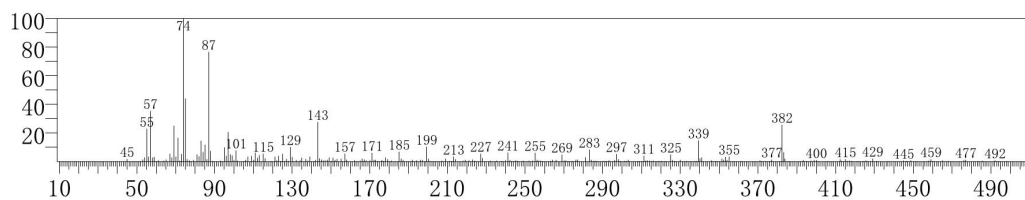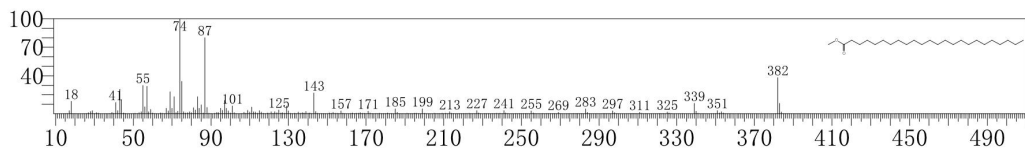

Figure S24. GC-MS spectrum of component **23**

Table S1 Molecular interactions of the  $\alpha$ -glucosidase (3A4A) active site with compounds **1** and **2**.

| Compounds       | Binding energy (kcal/mol) | H-bond                                                    | Hydrophobic interaction |                |               | Others   |
|-----------------|---------------------------|-----------------------------------------------------------|-------------------------|----------------|---------------|----------|
|                 |                           |                                                           | Pi-Alkyl                | Pi-Pi T-shaped | Pi-Pi Stacked | Pi-Anion |
| <b>1</b>        | -2.41                     | LYS466, THR83, TRP81, SER65, PRO66, GLN67, ARG413, LYS406 |                         | TRP36          | TYR470        |          |
| <b>2</b>        | -3.55                     | SER304, GLY309, PRO312, THR310, SER240, HIS280            | PRO312, HIS280, ARG315  | TYR158, HIS280 |               | ASP242   |
| <b>Acarbose</b> | -4.53                     | SER304, ASN302, GLU332, SER241, LYS156, ARG315, PRO312    |                         |                |               |          |
